# Supplementary material for: Variation in human cancer cell external phosphatidylserine is regulated by flippase activity and intracellular calcium
Source: PubMed Central journal article supplement (PMC4741459; doi:10.18632/oncotarget.6045), 2015-10-09
Supplement: oncotarget-06-34375-s001.pdf [file oncotarget-06-34375-s001.pdf]

## Variation in human cancer cell external phosphatidylserine is regulated by flippase activity and intracellular calcium

### Supplementary Material

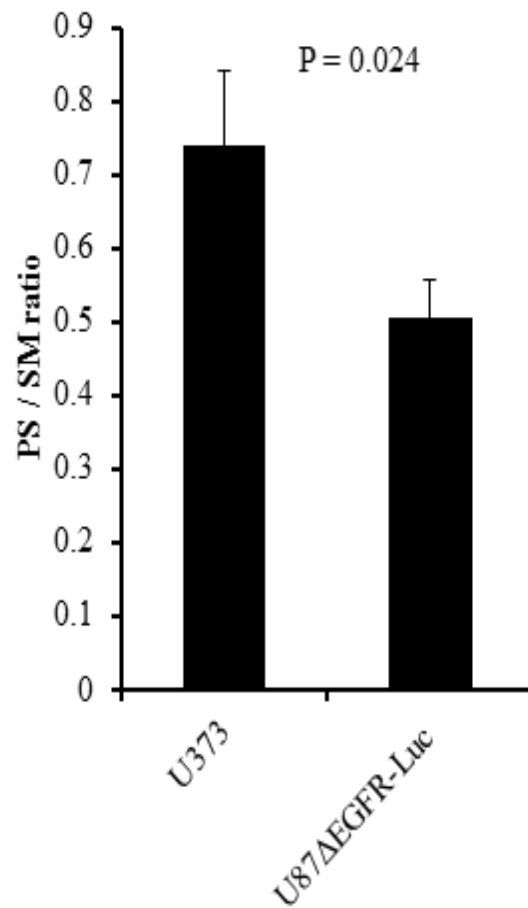

**Supplementary Figure 1.** Lipids from indicated cell lines were separated by TLC and total PS is presented as a ratio of PS to SM.
